# Supplementary material
Source: PubMed Central journal article supplement (PMC6836679)
Supplement: NIHMS1528621-supplement-1.pdf [file NIHMS1528621-supplement-1.pdf]

## Supplemental Data

Table S1. Related to STAR Methods. Primer sequences for qPCR and gRNAs

| Gene           | Forward                        | Reverse                          |
|----------------|--------------------------------|----------------------------------|
| <i>Adipoq</i>  | GCA CTG GCA AGT TCT ACT GCA A  | GTA GGT GAA GAG AAC GGC CTT GT   |
| <i>Pparg2</i>  | TGG CAT CTC TGT GTC AAC CAT G  | GCA TGG TGC CTT CGC TGA          |
| <i>Tbp</i>     | GAA GCT GCG GTA CAA TTC CAG    | CCC CTT GTA CCC TTC ACC AAT      |
| <i>Ucp1</i>    | ACT GCC ACA CCT CCA GTC ATT    | CTT TGC CTC ACT CAG GAT TGG      |
| <i>Cidea</i>   | TGC TCT TCT GTA TCG CCC AGT    | GCC GTGT TAA GGA ATC TGC TG      |
| <i>Fabp4</i>   | ACA CCG AGA TTT CCT TCA AAC TG | CCA TCT AGG GTT ATG ATG CTC TTCA |
| <i>Pgc1a</i>   | CCC TGC CAT TGT TAA GAC C      | TGC TGC TGT TCC TGT TTT C        |
| <i>Prdm16</i>  | CCC TGC CAT TGT TAA GAC C      | TGC TGC TGT TCC TGT TTT C        |
| <i>Cebpa</i>   | TGC GCA AGA GCC GAG ATA A      | CGG TCA TTG TCA CTG GTC AAC T    |
| <i>Cpt1b</i>   | GCA CAC CAG GCA GTA GCT TT     | CAG GAG TTG ATT CCA GAC AGG TA   |
| <i>Acadl</i>   | TCT TTT CCT CGG AGC ATG ACA    | GAC CTC TCT ACT CAC TTC TCC AG   |
| <i>Acadm</i>   | AGG GTT TAG TTT TGA GTT GAC GG | CCC CGC TTT TGT CAT ATT CCG      |
| <i>Hmgcs2</i>  | GAA GAG AGC GAT GCA GGA AAC    | GTC CAC ATA TTG GGC TGG AAA      |
| <i>Oxct1</i>   | CAT AAG GGG TGT GTC TGC TAC T  | GCA AGG TTG CAC CAT TAG GAA T    |
| <i>Acaa2</i>   | CCT CAG TTC TTG TCT GTT CAG    | AGG TGT GCG GTG ATT CTG          |
| <i>Slc27a2</i> | TCC TCC AAG ATG TGC GGT ACT    | TAG GTG AGC GTC TCG TCT CG       |
| <i>Mmp3-F</i>  | ACA TGG AGA CTT TGT CCC TTT TG | TTG GCT GAG TGG TAG AGT CCC      |
| <i>Acta2</i>   | GTC CCA GAC ATC AGG GAG TAA    | TCG GAT ACT TCA GCG TCA GGA      |
| <i>Fbln2</i>   | CTG TGA AGA CCA AGA CGA GTG    | CGT TGA GGA TAT AGC CCT CTG C    |
| <i>Lox</i>     | AGC ATG AAA GCA AGG CGC ATA    | GTA CGC ATC TAC GCA GTT CTG      |
| <i>Mmp3</i>    | ACA TGG AGA CTT TGT CCC TTT TG | TTG GCT GAG TGG TAG AGT CCC      |
| <i>Col1a1</i>  | TGA CTG GAA GAG CGG AGA GT     | GTT CGG GCT GAT GTA CCA GT       |
| <i>Col3a1</i>  | GTG CTC CTG GAC AGA ATG GT     | CAC CCT TTA CAC CCT GAG GA       |
| <i>Col4a1</i>  | GCC AAG TGT GCA TGA GAA GA     | AGC GGG GTG TGT TAG TTA CG       |

| guide RNA    | Forward                          | Reverse                          |
|--------------|----------------------------------|----------------------------------|
| <i>R26R</i>  | CAC CGA AGA TGG GCG GGA GTC TTCT | AAA CAG AAG ACT CCC GCC CAT CTTC |
| <i>Hif1a</i> | CAC CGT TTC TTC TCG TTC TCG CCGC | AAA CGC GGC GAG AAC GAG AAG AAAC |

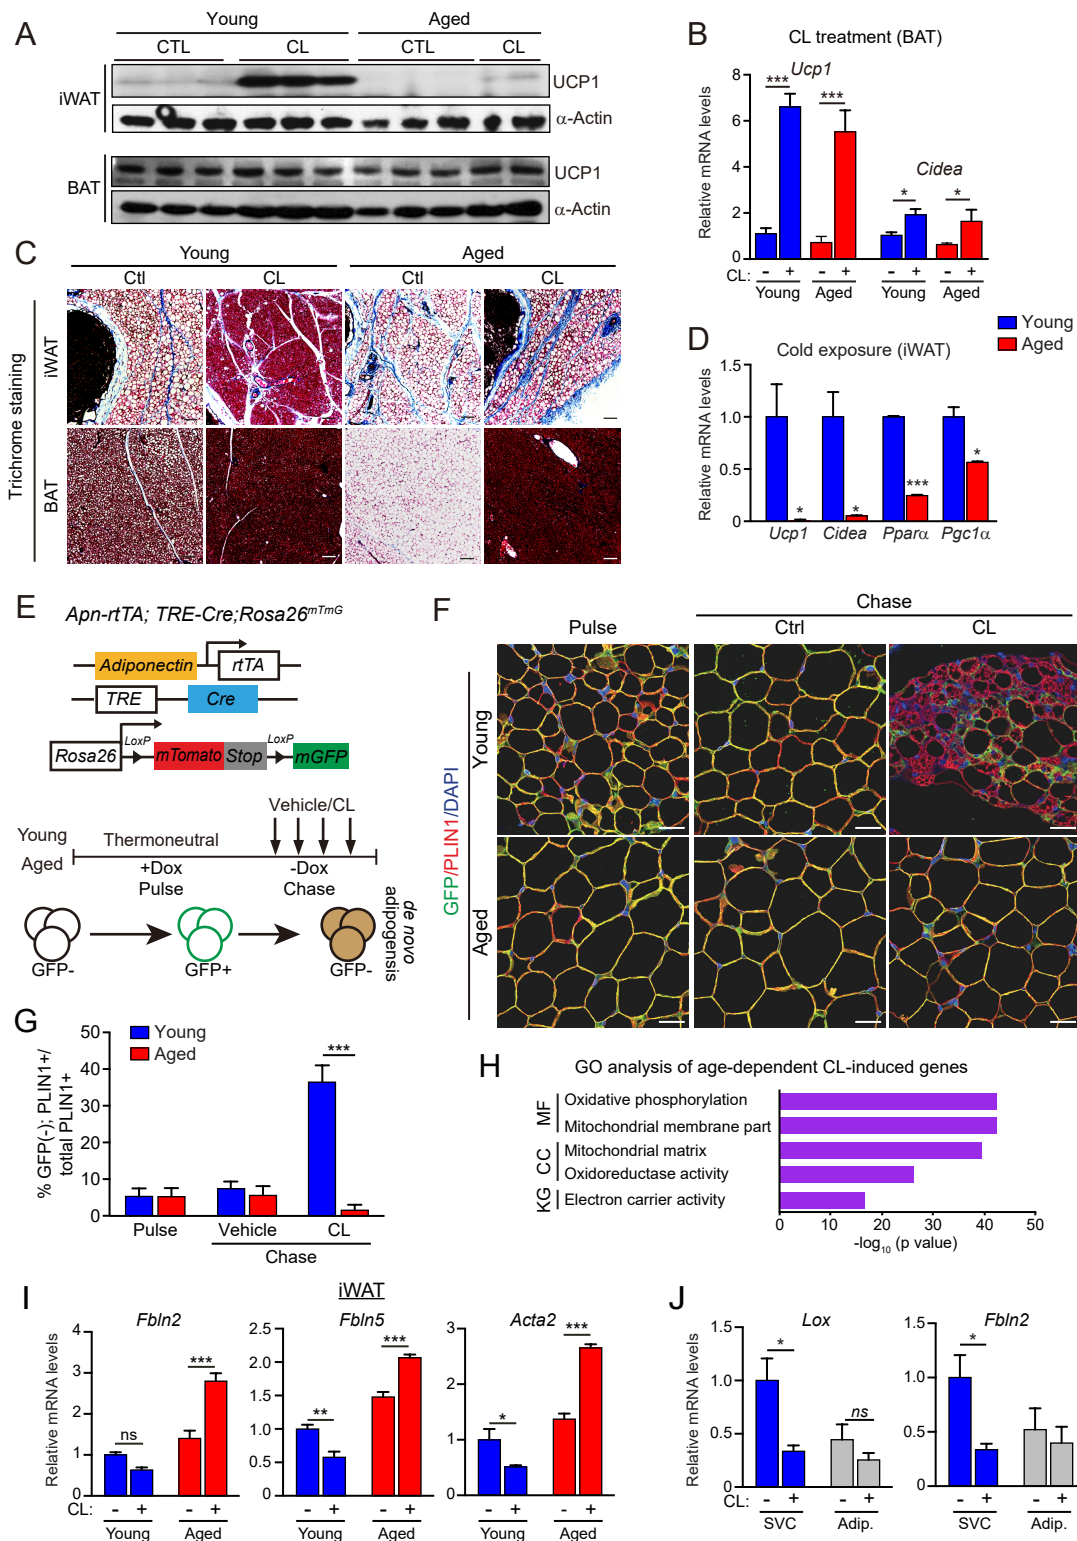

**Fig. S1, Related to Fig. 1. Reduced beige adipocyte differentiation in aged mice**

(A-C) Thermoneutral-housed young (2-month) and aged (12-month) mice were treated with vehicle or CL for 5 days. (A) Western blot analysis of UCP1 and  $\alpha$ -Actin in iWAT and BAT. (B) mRNA levels of thermogenic genes in BAT. (C) Trichrome staining of collagen in iWAT and BAT. Scale bar, 100  $\mu$ m. (D) mRNA levels of thermogenic genes in iWAT of young and aged mice following 1 wk of cold exposure. (E) Young and aged thermoneutral-housed *Adipochaser* mice were treated with doxycycline (Dox) to label adipocytes with mGFP (pulse). 2 days later, mice were treated with vehicle (Ctrl) or CL for 4 days (chase). (F) Immunofluorescence staining of Perlipin1 (PLIN1; red) and GFP (green) in iWAT. Nuclei (DAPI, blue); scale bar, 25  $\mu$ m. (G) Quantification of adipogenesis (% of GFP<sup>-</sup>; PLIN1<sup>+</sup>/total PLIN1<sup>+</sup> cells). (H) Gene ontology (GO) analysis of genes selectively induced by CL in young vs. aged mice (purple cluster from Fig.1C). MF, Molecular Function; CC, Cellular Component; KG, KEGG Pathway. (I) mRNA levels of fibrosis genes in young and aged mice treated with vehicle or CL. (J) mRNA levels of fibrosis genes in stromal vascular cells (SVC) and adipocytes (Adip) from young mice housed at thermoneutrality or exposed to 4°C for 1 wk. Data are mean  $\pm$  sem; \*p < 0.05, \*\*p < 0.01, \*\*\*p < 0.001. n=3-5 per group.

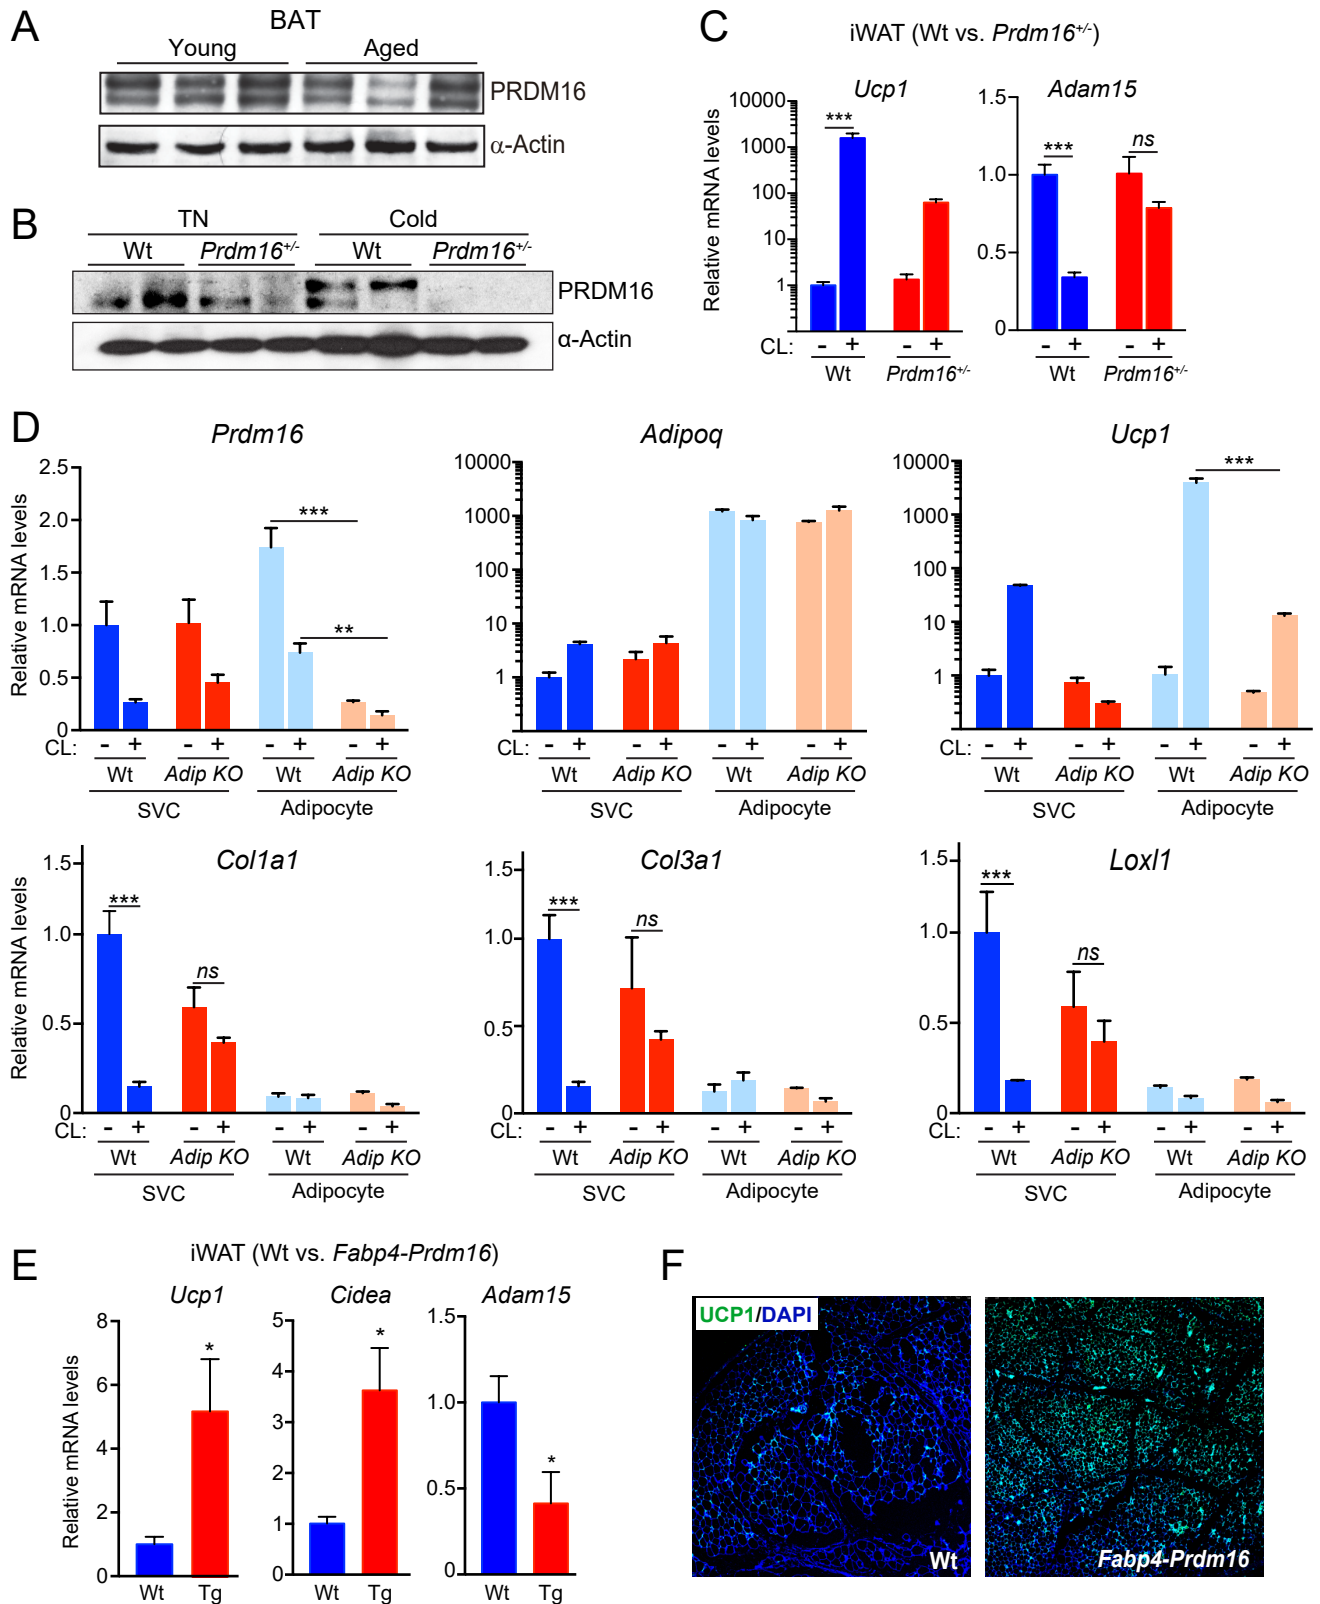

**Fig. S2, Related to Fig. 2. PRDM16 regulates beige fat remodeling**

(A) Western blot analysis of PRDM16 and  $\alpha$ -Actin in BAT from young and aged mice housed at thermoneutrality. (B) Western blot analysis of PRDM16 and  $\alpha$ -Actin in iWAT from wildtype (Wt) and *Prdm16*<sup>-/-</sup> mice treated with vehicle (Ctrl) or CL. (C) mRNA levels of *Ucp1* and fibrosis marker *Adam15* in iWAT from 3-month-old wildtype (Wt) and *Prdm16*<sup>-/-</sup> mice treated with vehicle or CL for 4 days. (D) mRNA levels of adipocyte and fibrosis genes in stromal vascular cells (SVC) and adipocytes isolated from wildtype (Wt) or adipocyte-selective *Prdm16*-knockout (*Adip. KO*) mice, treated with vehicle or CL. (E,F) 1-year-old wildtype and *Fabp4-Prdm16* transgenic mice were housed at thermoneutrality and treated with CL for 4 days. (E) mRNA levels of thermogenic genes and *Adam15*. (F) Immunofluorescence staining for UCP1 (green) in iWAT. Nuclei (DAPI, blue). Data are mean  $\pm$  sem; \* $p$  < 0.05, \*\* $p$  < 0.01, \*\*\* $p$  < 0.001.  $n$ =3-5 per group.

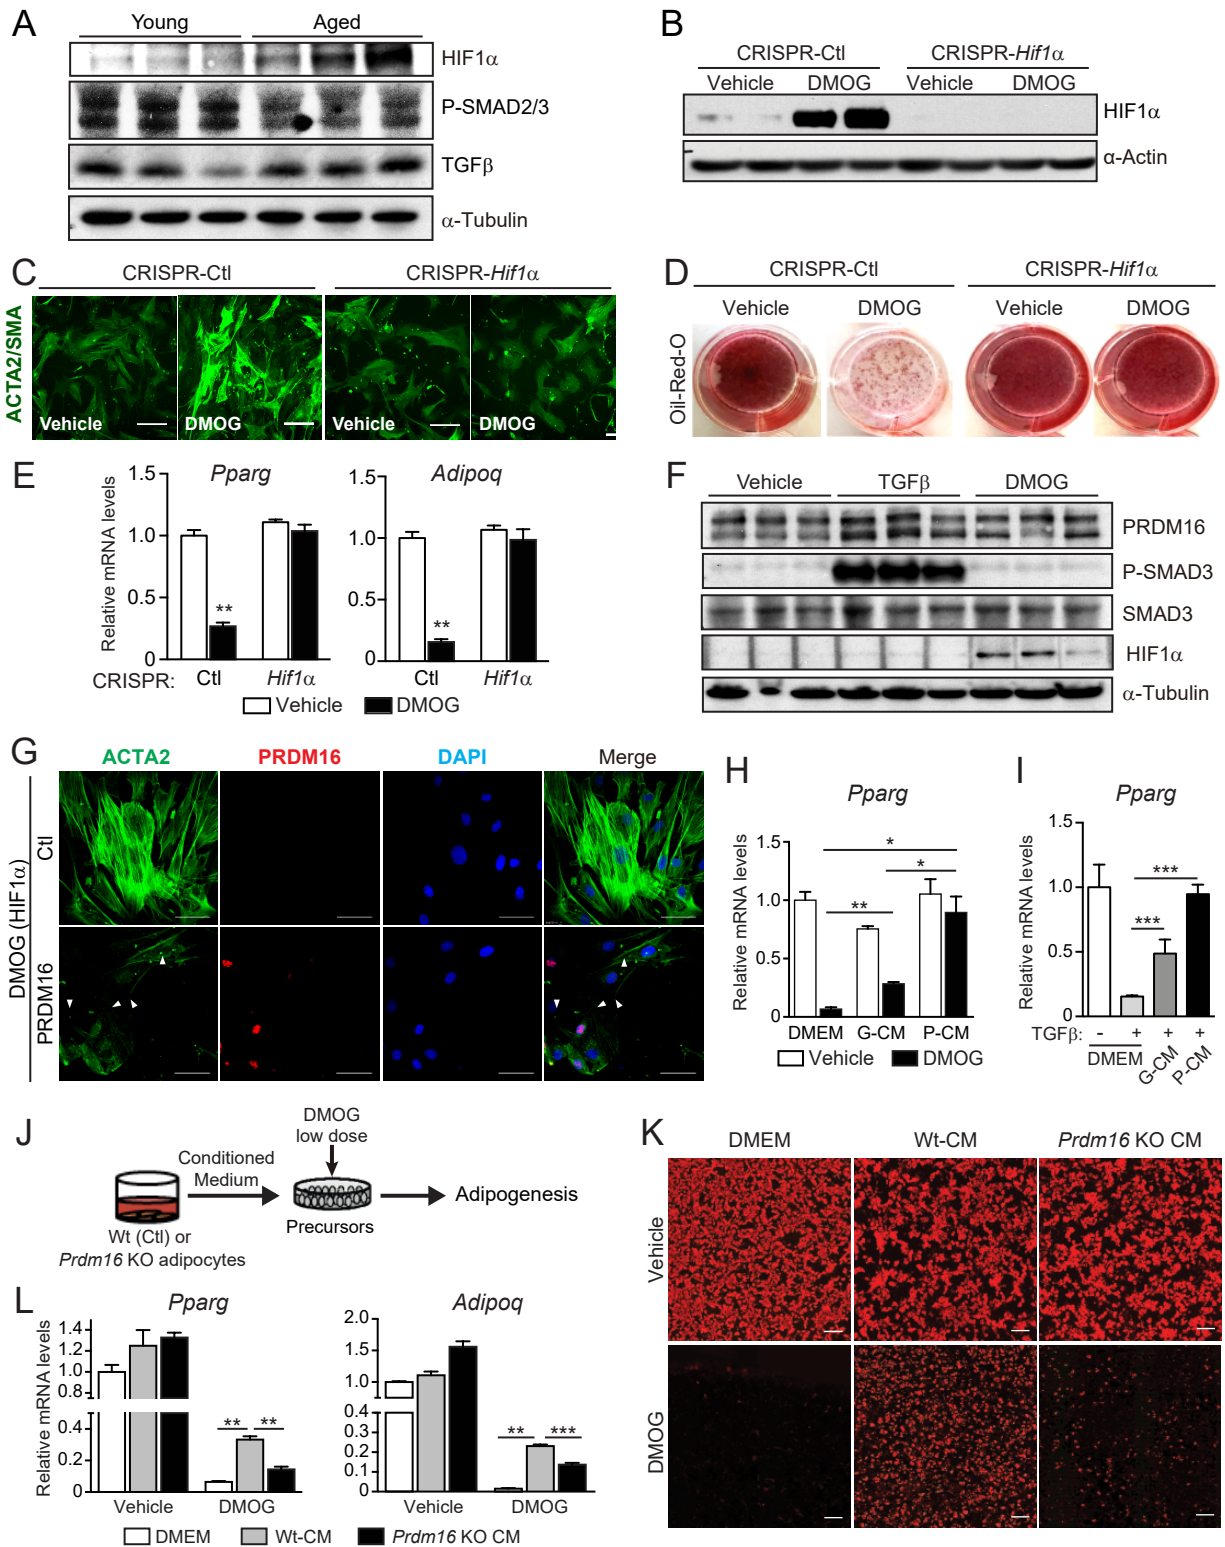

**Fig. S3, Related to Fig. 3. PRDM16 suppresses precursor fibrogenesis**

**(A)** Western blot analysis of indicated proteins in iWAT of young and aged mice. **(B-E)** iWAT precursor cells were transduced with retrovirus expressing CRISPR/Cas9 and *Rosa26* (Ctl) or *Hif1α* guide RNAs (gRNAs) and then treated with vehicle or DMOG.

**(B)** Western blot analysis of HIF1 $\alpha$  and  $\alpha$ -Actin. **(C)** Immunofluorescence staining for ACTA2. Scale bar, 100  $\mu$ m. **(D)** Oil-Red-O staining of adipocytes. **(E)** mRNA levels of adipocyte genes. **(F)** Western blot analysis of indicated proteins in day 8 differentiated adipocytes treated with vehicle, TGF $\beta$ , or DMOG for 2 days. **(G)** Immunofluorescence staining of ACTA2 (green) and PRDM16 (red) in iWAT precursors expressing control (Ctl) or PRDM16 retrovirus. Nuclei (DAPI, blue); scale bar, 100  $\mu$ m. **(H-I)** iWAT precursor cells were treated with: (1) control medium (DMEM), GFP-CM or P-CM; and (2) vehicle, DMOG or TGF $\beta$ . After 24 h, cultures were induced to differentiate into adipocytes for 5 days. **(H,I)** mRNA levels of *Pparg*. **(J-L)** DMOG-treated iWAT precursor cells were incubated with CM from wildtype (Wt) or *Prdm16*-knockout (KO) adipocytes during adipogenic differentiation. **(K)** LipidTOX staining of adipocytes. Scale bar, 200  $\mu$ m. **(L)** mRNA levels of adipocyte genes. Data are mean  $\pm$  s.e.m; \* $p$ <0.05, \*\* $p$ <0.01, \*\*\* $p$ <0.001. n=3-5.









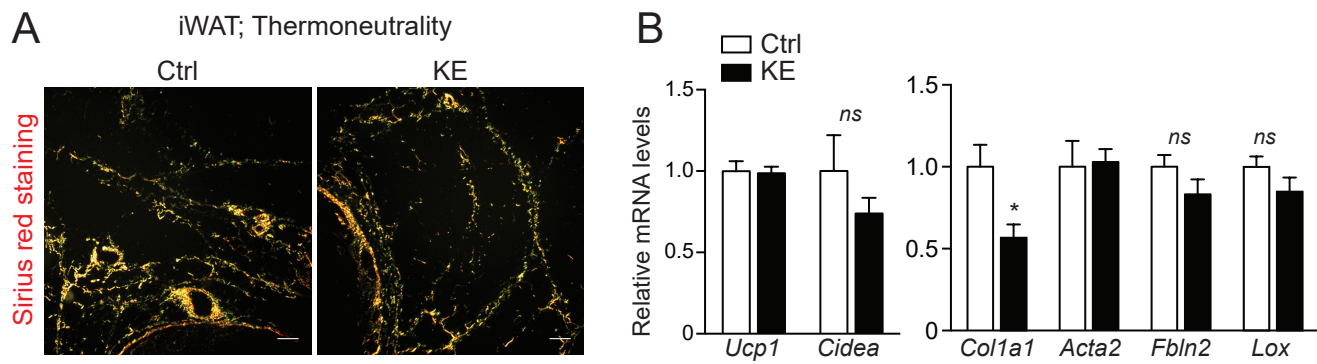

**Fig.S7, Related to Fig. 7. KE diet is not sufficient to induce beigeing in thermoneutral-housed mice**

**(A-B)** Thermoneutral-acclimated aged mice were pair-fed a control (Ctrl) or Ketone ester diet (KE) for 4 weeks. **(A)** Sirius red staining of collagen fibers in iWAT. Scale bar, 100  $\mu$ M. **(B)** mRNA levels of thermogenic and fibrosis genes in iWAT of indicated animals.  $n=10$  mice per group. Data are mean  $\pm$  sem. \* $p<0.05$ .
